# Supplementary material for: Targeted Amino Acid Substitutions Impair Streptolysin O Toxicity and Group A Streptococcus Virulence
Source: PubMed Central journal article supplement — mBio. 2013 Jan 8;4(1):e00387-12. doi: 10.1128/mBio.00387-12 (PMC3546560; doi:10.1128/mbio.00387-12), 2013-01-08
Supplement: mbo006121411so1.pdf [file mbo006121411so1.pdf]

**TABLE S1** SLO P427L/W535F (SLOdm) is not toxic in a mouse model of intravenous injection

| Dose ( $\mu\text{g}/\text{mouse}$ ) | Protein          |                     |
|-------------------------------------|------------------|---------------------|
|                                     | SLOwt            | SLOdm               |
| 2                                   | 4/4 <sup>a</sup> |                     |
| 5                                   | 0/8              | 8/8 <sup>***b</sup> |
| 10                                  |                  | 8/8                 |
| 50                                  |                  | 4/4                 |
| 100                                 |                  | 4/4                 |

<sup>a</sup> Number of animals survived/number of animals tested.

<sup>b</sup> Fisher's exact test (\*\*\*, P val < 0.001).
