# Supplementary material for: Targeted Amino Acid Substitutions Impair Streptolysin O Toxicity and Group A Streptococcus Virulence
Source: PubMed Central journal article supplement — mBio. 2013 Jan 8;4(1):e00387-12. doi: 10.1128/mBio.00387-12 (PMC3546560; doi:10.1128/mbio.00387-12), 2013-01-08
Supplement: mbo006121411so2.pdf [file mbo006121411so2.pdf]

**TABLE S2** Oligonucleotides used to clone SLO mutant derivatives

| Name <sup>a</sup> | Sequence <sup>b</sup>                                       | 5'-Terminal restriction site |
|-------------------|-------------------------------------------------------------|------------------------------|
| Fslore            | GTGCGT <u>GCTAGC</u> GAATCGAACAAACAAAACACTGC                | NheI                         |
| Rslore            | GCATT <u>CGATCCTCGAG</u> CTTATAAGTAATCGAACCATATGGG          | XhoI                         |
| FP427G            | ATGCTACCTTCAGTAGAAAAAC <b>GG</b> AGCTTATCCTATTTTCATACACCA   | None                         |
| RP427G            | TGGTGTATGAAATAGGATAAGCT <b>CC</b> GTTTTTTTCTACTGAAGGTAGCAT  | None                         |
| FP427L            | ATGCTACCTTCAGTAGAAAAAC <b>CCT</b> GCTTATCCTATTTTCATACACCA   | None                         |
| RP427L            | TGGTGTATGAAATAGGATAAGC <b>AGG</b> GTTTTTTTCTACTGAAGGTAGCAT  | None                         |
| FP427K            | ATGCTACCTTCAGTAGAAAAAC <b>AA</b> AGCTTATCCTATTTTCATACACCA   | None                         |
| RP427K            | TGGTGTATGAAATAGGATAAGCT <b>TTT</b> GTTTTTTTCTACTGAAGGTAGCAT | None                         |
| FP427E            | ATGCTACCTTCAGTAGAAAAAC <b>GA</b> AGCTTATCCTATTTTCATACACCA   | None                         |
| RP427E            | TGGTGTATGAAATAGGATAAG <b>CTT</b> CGTTTTTTTCTACTGAAGGTAGCAT  | None                         |
| FW535F            | GAGTGCCTGGCTTAGCT <b>TT</b> CGAATGGTGGCGAAAAGTGATC          | None                         |
| RW535F            | GATCACTTTTCGCCACCATT <b>C</b> GAAGCTAAGCCAGTGCACTC          | None                         |
| FC530G            | CCGTATCATGGCTAGAGAG <b>G</b> GCCTGGCTTAGCTTGGGAATG          | None                         |
| RC530G            | CATTCCAAGCTAAGCCAGT <b>G</b> CCCTCTCTAGCCATGATACGG          | None                         |

<sup>a</sup>F, forward (coding strand); R, reverse (non coding strand).

<sup>b</sup>Oligonucleotide sequences were derived from the sequenced *slo* locus in M1-SF370. Where indicated, additional nucleotides were added to the 5' terminus to create specific restriction enzyme cutting sites (underlined). The sequences indicated in bold are those substituted to generate mutants by SOEing.
