# Supplementary material for: Targeted Amino Acid Substitutions Impair Streptolysin O Toxicity and Group A Streptococcus Virulence
Source: PubMed Central journal article supplement — mBio. 2013 Jan 8;4(1):e00387-12. doi: 10.1128/mBio.00387-12 (PMC3546560; doi:10.1128/mbio.00387-12), 2013-01-08
Supplement: mbo006121411so3.pdf [file mbo006121411so3.pdf]

**TABLE S3** Oligonucleotides used to generate the 3348*s/odm* and 3348 $\Delta$ *s/o* strains

| Name             | Sequence <sup>a</sup>                | Description <sup>a</sup> /Orientation <sup>b</sup> | 5'-Terminal restriction site |
|------------------|--------------------------------------|----------------------------------------------------|------------------------------|
| <i>Fs/o</i> SOE1 | <u>GGATCC</u> CTTAGCAGAGATTGATGC     | 631bp upstream of SLO start/F                      | BamHI                        |
| <i>Rs/o</i> SOE1 | ATAATTGATTTCACTGGTTGCTCATTGTCGT      | 132bp downstream of SLO start/R                    | None                         |
| <i>Fs/o</i> SOE2 | ACAAATGAGCAACCAGATGAAATCAATTATGATGAC | 1443bp downstream of SLO start/F                   | None                         |
| <i>Rs/o</i> SOE2 | <u>CTCGAG</u> CCATATAACCTTGACCGG     | 2309bp downstream of SLO start/R                   | XhoI                         |
| <i>Fs/o</i> EXT  | AAAGCGGAGCTTCTCACGTTACAAGT           | 1041bp upstream of SLO start/F                     | None                         |
| <i>Rs/o</i> EXT  | GTCTATGAAGGTATCTCATAGAC              | 1806bp downstream of SLO start/R                   | None                         |

<sup>a</sup>Oligonucleotide sequences were derived from the sequenced *s/o* locus in M1-3348. Where indicated, additional nucleotides were added to the 5' terminus to create specific restriction enzyme cutting sites (underlined). The sequences indicated in italics are complementary and used to fuse PCR fragments by SOEing.

<sup>b</sup>F, forward (coding strand); R, reverse (non coding strand).
