# Supplementary material for: Targeted Amino Acid Substitutions Impair Streptolysin O Toxicity and Group A Streptococcus Virulence
Source: PubMed Central journal article supplement — mBio. 2013 Jan 8;4(1):e00387-12. doi: 10.1128/mBio.00387-12 (PMC3546560; doi:10.1128/mbio.00387-12), 2013-01-08
Supplement: mbo006121411so4.pdf [file mbo006121411so4.pdf]

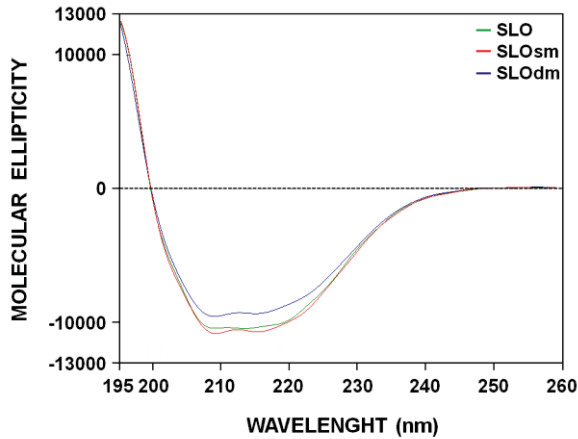

|       | $\alpha$ -helix (%) | $\beta$ -sheet (%) | $\beta$ -turn (%) | other (%) | Tm (°C) |
|-------|---------------------|--------------------|-------------------|-----------|---------|
| SLO   | 30                  | 25                 | 12                | 33        | 45.76   |
| SLOsm | 30                  | 25                 | 12                | 33        | 45.03   |
| SLOdm | 28                  | 26                 | 12                | 34        | 45.50   |

**FIG. S1** Structural analysis of SLO and mutant derivatives. Circular dichroism profiles of SLO, SLO P427L (SLOsm) and SLO P427L-W535F (SLOdm). The percentage of protein regions with different secondary structures and the T melting temperature (Tm) obtained by Differential Scanning Calorimetry (DSC) are reported in the lower table.
