# Supplementary material for: Targeted Amino Acid Substitutions Impair Streptolysin O Toxicity and Group A Streptococcus Virulence
Source: PubMed Central journal article supplement — mBio. 2013 Jan 8;4(1):e00387-12. doi: 10.1128/mBio.00387-12 (PMC3546560; doi:10.1128/mbio.00387-12), 2013-01-08
Supplement: mbo006121411so5.pdf [file mbo006121411so5.pdf]

**A**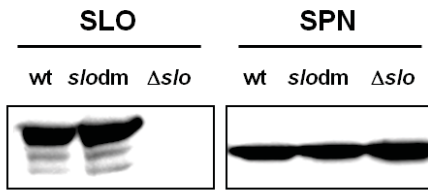**B**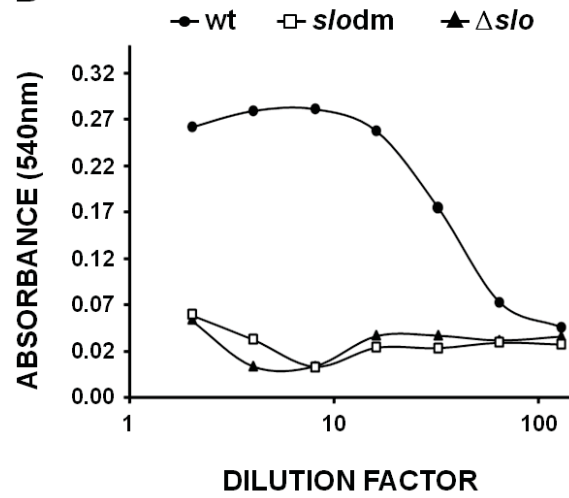

**FIG. S2** Phenotypic characterization of M1-3348 isogenic mutants. (A) Western blot analysis of secreted SLO and NAD-glycohydrolase (SPN) in the culture medium of 3348 strains expressing SLO (wt), SLOdm (*s/odm*) or not expressing the toxin ( $\Delta s/o$ ). (B) Hemolysis test performed on sheep blood cells using supernatants from GAS cultures belonging to 3348wt (wt), 3348-*s/odm* (*s/odm*) or 3348- $\Delta s/o$  ( $\Delta s/o$ ) strains.
